# Supplementary material
Source: ML conference proceedings conference paper supplement (https://openreview.net/forum?id=djGx0hucok)
Supplement: supplementary_material [file attachment]

# FedLLM-Bench: Realistic Benchmarks for Federated Learning of Large Language Models

## Supplementary Materials

### 1 Dataset

#### 1.1 Links and Preservation

We have provided data processing code and training benchmarks in our GitHub repository at <https://github.com/rui-ye/FedLLM-Bench> and the data can be downloaded at [data](#). The croissant metadata record is available at [croissant](#). We chose GitHub and Google Drive respectively to store our code and dataset. Both are widely recognized as reliable data storage platforms, ensuring long-term preservation. We highly recommend downloading the raw data directly and following the provided instructions to simplify the data processing steps.

#### 1.2 Dataset Structure

Our dataset is structured as follows: the **local** directory contains client-specific data for local training, while **all\_clients** aggregates data from all clients for federated learning. All datasets are stored in JSON format.

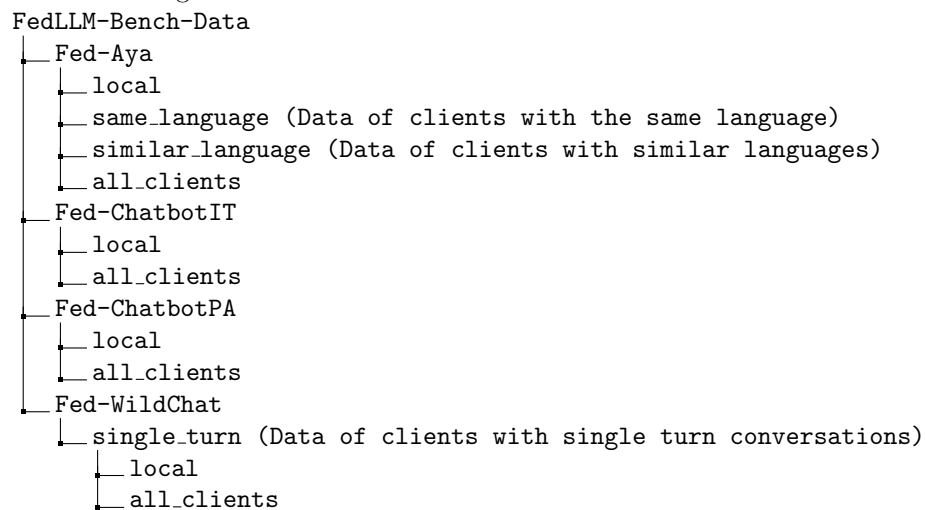

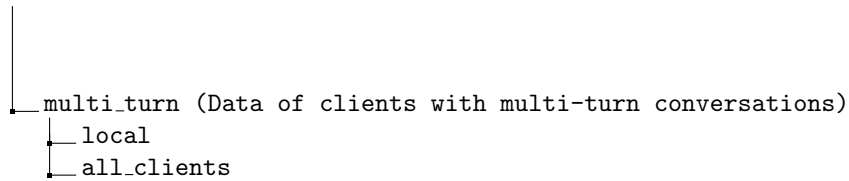

For federated training, the data file consists of a dictionary where each key represents a user, and the corresponding value is a list containing all data samples for that user. In contrast, the data file for local training is a list of dictionaries, each representing a data sample of the user. An example data sample for instruction tuning is provided, and a similar structure applies for value alignment, where keys include **prompt**, **chosen**, and **rejected** as detailed in our publication.

```

1 {
2     "instruction": String,
3     "response": String
4 }

```

For multi\_turn federated training, the data file consists of a dictionary where each key represents a user, and the value is a list of sub-dictionaries. Each sub-dictionary has two key-value pairs. The former represents the ID of the multi\_turn chat of a specific user. The latter contains multi\_turn chat content between human and gpt. We show a simple example as follows, a user "34131" has one multi\_turn chat data, which consists of two turn conversation.

```

1 {
2     "34131": [
3         {
4             "id": "identity_0",
5             "conversations": [
6                 {
7                     "from": "human",
8                     "value": "how..."
9                 },
10                {
11                    "from": "gpt",
12                    "value": "As..."
13                },
14                {
15                    "from": "human",
16                    "value": "Show..."
17                },
18                {
19                    "from": "gpt",
20                    "value": "Sure..." }
21            ]
22        }
23    ]
24 }

```

The pre-processing of multi\_turn data is different from single\_turn data. Instead of using the function *DataCollatorForCompletionOnlyLM* in *trl* library, we manually set the position to calculate loss following FastChat.

### **1.3 Intended Use**

Our dataset is used to benchmark federated learning algorithms for large language models. Additionally, due to its diversity and realness, it can also be utilized for further research such as studying real user preferences and multi-language training of large language models.

### **1.4 Host and Licence**

As detailed in our publication, our dataset is sourced from existing publicly available datasets. These datasets are well-known on Hugging Face and originate from reputable institutions, with original licenses already provided. Therefore, we do not provide additional licenses here.

### **1.5 Reproducibility**

All code for training and evaluation is provided at <https://github.com/ruiye/FedLLM-Bench>. Our results can be easily reproduced using our code.
